# Supplementary material
Source: publisher site journal article supplement (https://www.dovepress.com/article/310729)
Supplement: Supplementary file 1 [file get_supplementary_file.php]

**Supplementary Figure Legends**

**
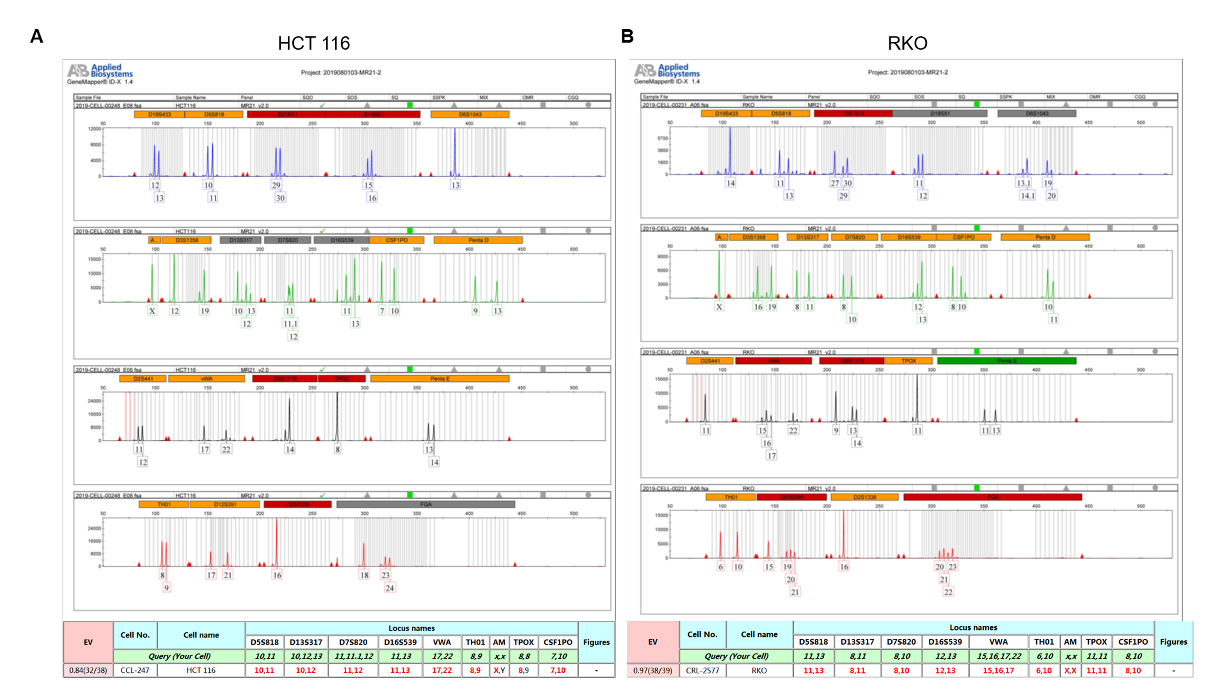
Fig S1. Cell STR identification.**

(A, B) STR identification of CRC cell lines HCT116 (A) and RKO (B).

**
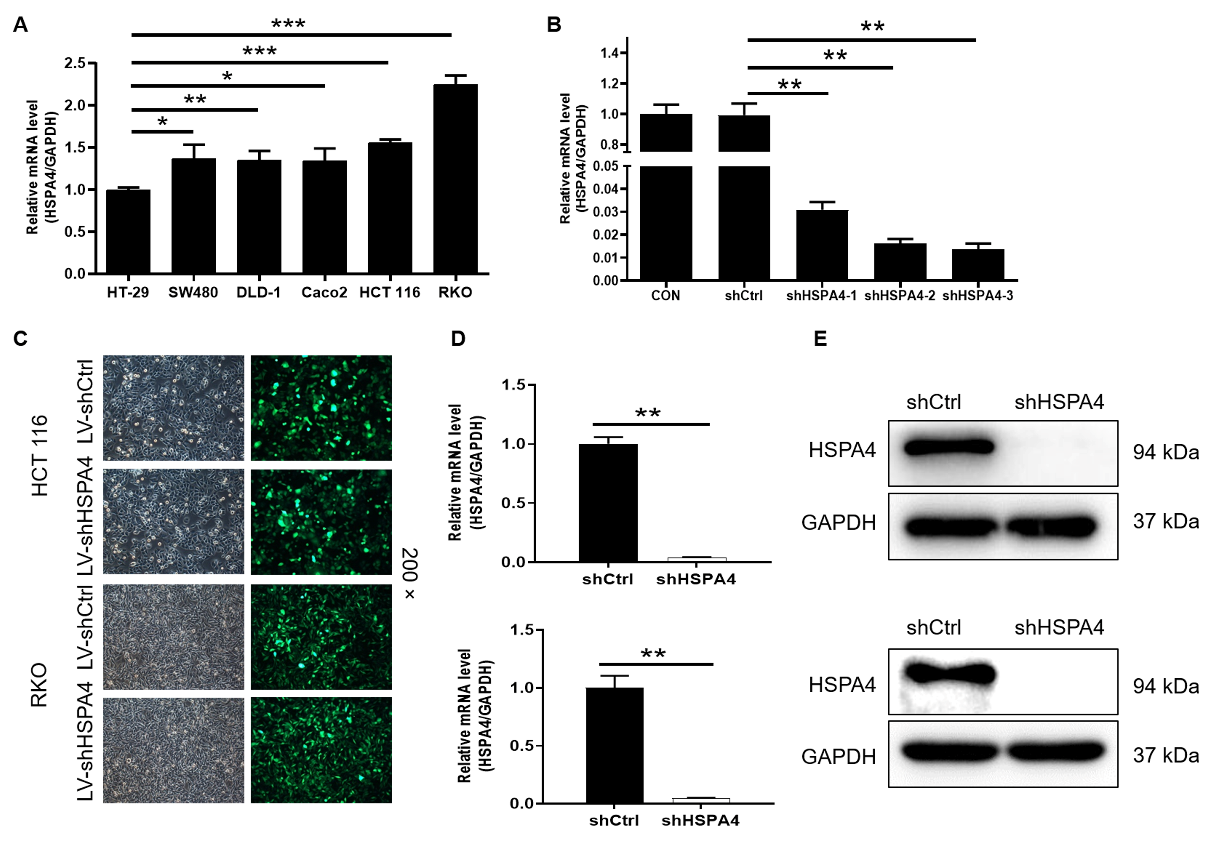
Fig S2. ShRNA-mediated knockdown** **of** **HSPA4 in CRC cell lines.**

(A) Relative HSPA4 mRNA expression in the indicated CRC cell lines detected by RT-qPCR. (B) RT-qPCR was used to screen knockdown efficiency of HSPA4 in shHSPA4-1, shHSPA4-2, and shHSPA4-3. (C) Transfection efficiencies for HCT116 and RKO cells were evaluated by expression of green fluorescent protein 72 h post-infection. (D, E) The specificity and validity of the lentivirus-mediated shRNA knockdown of HSPA4 expression was verified by qPCR (D) and Western blotting analysis (E). Data are presented as the mean ± SD (n = 3) of three triplicates or independent experiments. *P<0.05, **P<0.01, ***P<0.001.
